# Supplementary material
Source: PubMed Central journal article supplement (PMC5744699)
Supplement: EHP875.s001.acco.pdf [file EHP875.s001.acco.pdf]

**Note to readers with disabilities:** *EHP* strives to ensure that all journal content is accessible to all readers. However, some figures and Supplemental Material published in *EHP* articles may not conform to [508 standards](#) due to the complexity of the information being presented. If you need assistance accessing journal content, please contact [ehponline@niehs.nih.gov](mailto:ehponline@niehs.nih.gov). Our staff will work with you to assess and meet your accessibility needs within 3 working days.

## **Supplemental Material**

# **First Trimester Urinary Bisphenol A Concentration in Relation to Anogenital Distance, an Androgen-Sensitive Measure of Reproductive Development, in Infant Girls**

Emily S. Barrett, Sheela Sathyanarayana, Omar Mbowe, Sally W. Thurston, J. Bruce Redmon, Ruby H.N. Nguyen, and Shanna H. Swan

### **Table of Contents**

**Table S1.** TIDES participant demographics by study center.

**Table S2.** Linear regression models examining the relationship between log(SpG adj. (BPA)) and covariates and log-transformed anogenital distance measures in newborn daughters (n=381).

**Figure S1.** Scatterplots examining the relationship between AGD-AC and continuous covariates.

**Figure S2.** Scatterplots examining the relationship between AGD-AF and continuous covariates.

**Figure S3.** Adjusted generalized additive model plots with the response variable AGD-AC

**Figure S4.** Adjusted generalized additive model plots with the response variable AGD-AF

**Table S1. TIDES participant demographics by study center.**

| <b>Continuous variables<br/>(Mean ± SD)</b>     | <b>Overall<br/>(n=381)</b> | <b>UMN<br/>(n=94)</b> | <b>UCSF<br/>(n=98)</b> | <b>URMC<br/>(n=109)</b> | <b>UW<br/>(n=80)</b> |
|-------------------------------------------------|----------------------------|-----------------------|------------------------|-------------------------|----------------------|
| Maternal age (years)                            | 31.1 ± 5.6                 | 30.8 ± 4.5            | 34.7 ± 4.1             | 27.0 ± 5.7              | 32.7 ± 4.6           |
| Gestational age at birth (weeks)                | 39.4 ± 1.6                 | 39.5 ± 1.6            | 39.7 ± 1.6             | 39.0 ± 1.7              | 39.6 ± 1.5           |
| Age at exam (days)                              | 4.4 ± 10.4                 | 4.1 ± 10.8            | 4.9 ± 10.8             | 4.5 ± 9.0               | 4.2 ± 11.4           |
| Z-score weight-for-age                          | -0.4 ± 1.3                 | -0.4 ± 1.1            | -0.6 ± 1.3             | -0.3 ± 1.5              | -0.17 ± 1.2          |
| Post-conception age at exam (weeks)             | 40.1 ± 2.0                 | 40.0 ± 2.1            | 40.4 ± 2.0             | 39.7 ± 1.7              | 40.2 ± 2.3           |
| AGD-AC (mm)                                     | 36.6 ± 3.8                 | 36.7 ± 3.9            | 37.1 ± 4.3             | 36.1 ± 3.6              | 36.7 ± 3.4           |
| AGD-AF (mm)                                     | 16.0 ± 3.2                 | 16.3 ± 2.7            | 14.4 ± 3.2             | 15.5 ± 2.6              | 18.3 ± 3.2           |
| Time of urine collection (hours after midnight) | 12.6 ± 2.5                 | 12.8 ± 2.6            | 12.2 ± 2.6             | 12.4 ± 2.4              | 13.2 ± 2.3           |
| SpG-adjusted BPA (µg/L)                         | 1.8 ± 2.5                  | 2.0 ± 3.6             | 1.4 ± 1.7              | 2.1 ± 2.7               | 1.6 ± 1.7            |
| Gestational age at urine collection (weeks)     | 10.8 ± 2.0                 | 10.2 ± 2.0            | 12.1 ± 1.4             | 10.4 ± 1.9              | 10.5 ± 1.8           |
| <b>Categorical variables N(%)<sup>a</sup></b>   |                            |                       |                        |                         |                      |
| Race/ethnicity                                  |                            |                       |                        |                         |                      |
| White/non-Hispanic                              | 225 (60.7)                 | 75 (81.9)             | 54 (56.3)              | 41 (38.7)               | 55 (70.5)            |
| Other                                           | 147 (39.3)                 | 17 (18.1)             | 42 (43.8)              | 65 (62.3)               | 23 (29.5)            |
| Education                                       |                            |                       |                        |                         |                      |
| High school or less                             | 55 (14.7)                  | 2 (2.2)               | 2 (2.0)                | 50 (45.9)               | 1 (1.3)              |
| Some college or more                            | 320 (85.3)                 | 89 (97.8)             | 96 (98.0)              | 59 (54.1)               | 76 (98.7)            |

<sup>a</sup> Percentages may not add up to 100% due to rounding.

**Table S2. Linear regression models examining the relationship between log(SpG adj. (BPA)) and covariates<sup>a</sup> and log-transformed anogenital distance measures in newborn daughters (n=381).**

| variables                    | Log(AGD-AC)          |                       | Log(AGD-AF)       |                       |
|------------------------------|----------------------|-----------------------|-------------------|-----------------------|
|                              | Unadjusted           | Adjusted              | Unadjusted        | Adjusted              |
|                              | Estimate (95% CI)    | Estimate (95% CI)     | Estimate (95% CI) | Estimate (95% CI)     |
| Log(SpG adj (BPA))           | -0.01 (-0.02, 0.001) | -0.02(-0.03, -0.005)  | 0.01(-0.01, 0.03) | 0.003(-0.02, 0.02)    |
| Maternal age                 |                      | -0.001(-0.003, 0.001) |                   | -0.004(-0.01, 0.000)  |
| Infant's post-conception age |                      | 0.01(0.01, 0.02 )     |                   | 0.01(0.001, 0.02)     |
| Weight-for-length z-score    |                      | 0.02(0.01, 0.03)      |                   | 0.01(-0.002, 0.03)    |
| Race                         |                      | 0.01(-0.01, 0.03)     |                   | -0.001(-0.04, 0.04)   |
| Urine collection time        |                      | 0.001(-0.003, 0.01)   |                   | 0.002(-0.01, 0.01)    |
| UCSF center                  |                      | 0.01(-0.02, 0.05)     |                   | -0.114(-0.174, -0.05) |
| URMC center                  |                      | -0.01(-0.05, 0.02)    |                   | -0.07(-0.128, -0.007) |
| UW center                    |                      | 0.003(-0.03, 0.04)    |                   | 0.113(0.05, 0.173)    |

<sup>a</sup> For race, the referent is non-Hispanic, white. For center, the referent is UMN. All other variables are continuous.

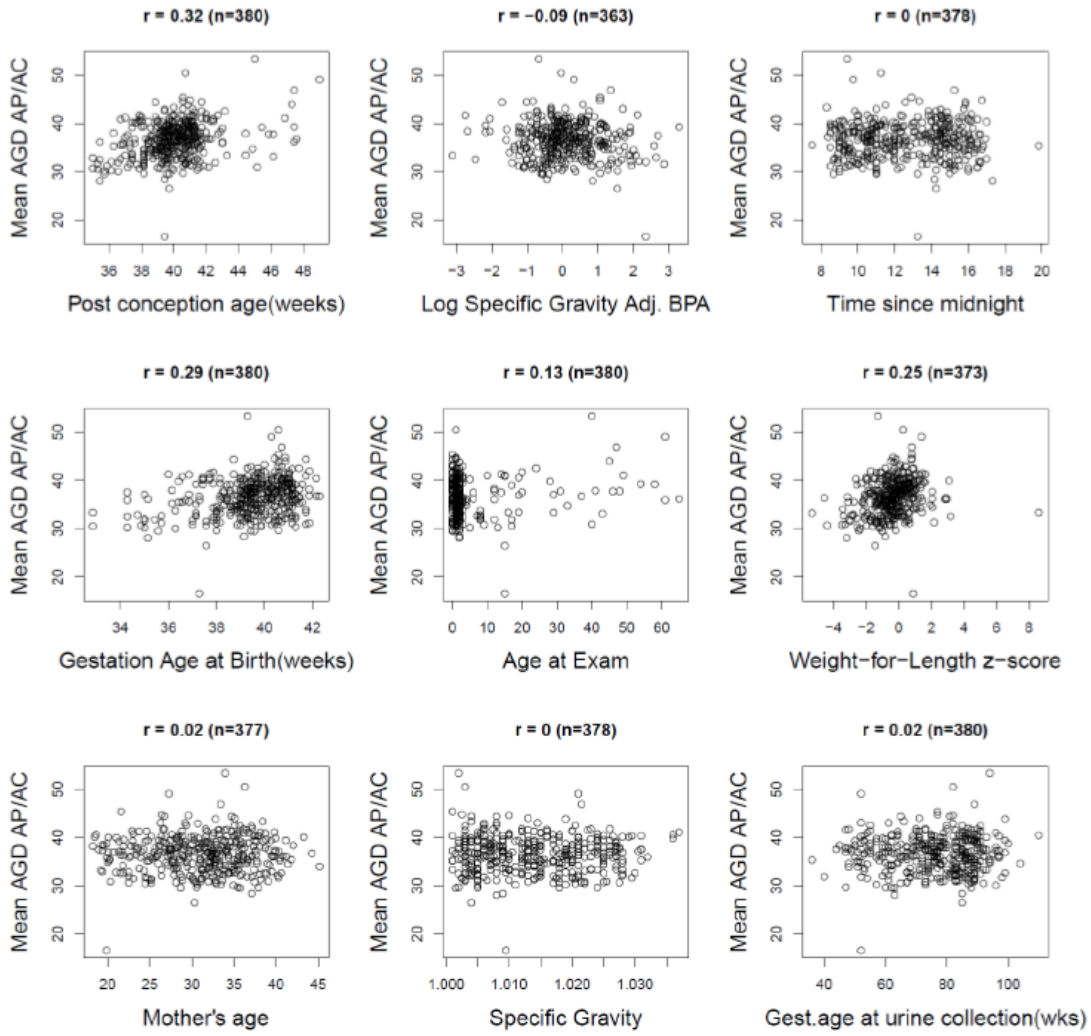

Figure S1. Scatterplots examining the relationship between AGD-AC and continuous covariates.

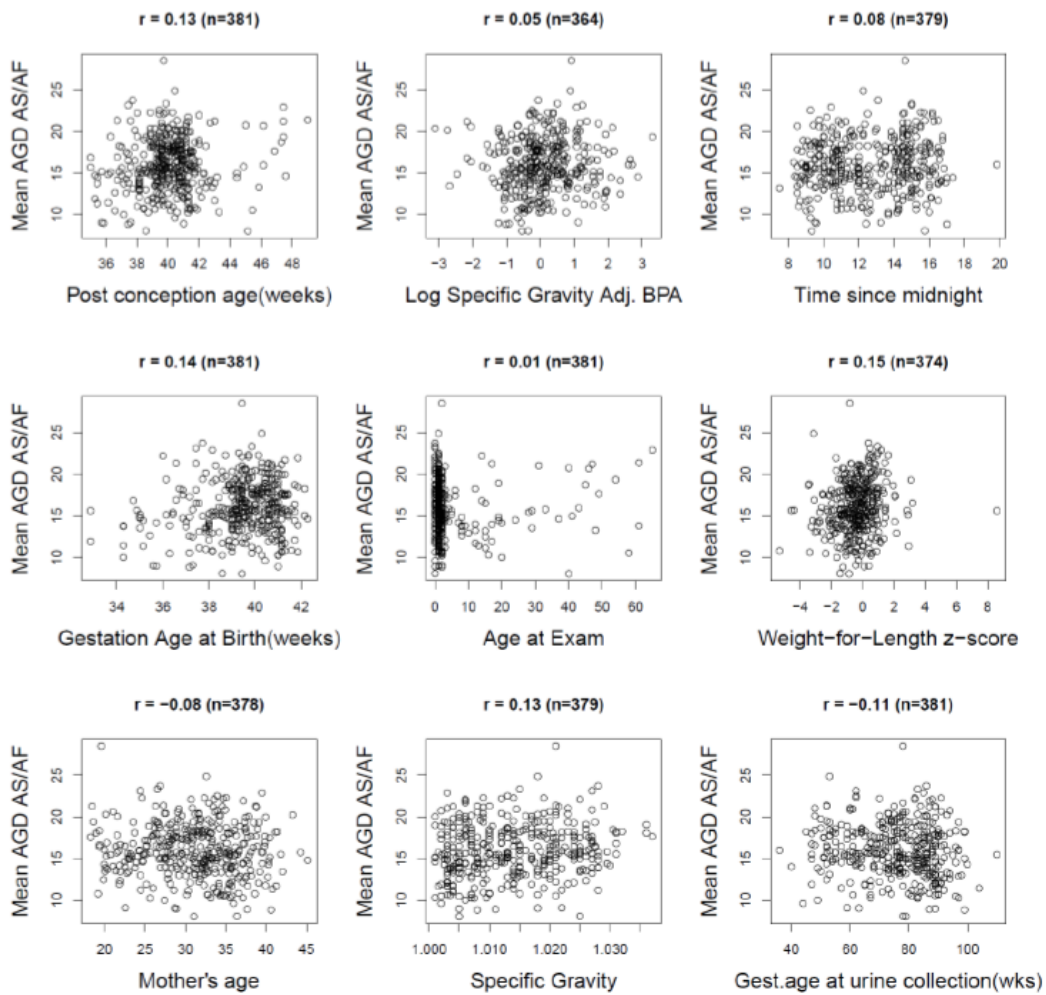

Figure S2. Scatterplots examining the relationship between AGD-AF and continuous covariates.

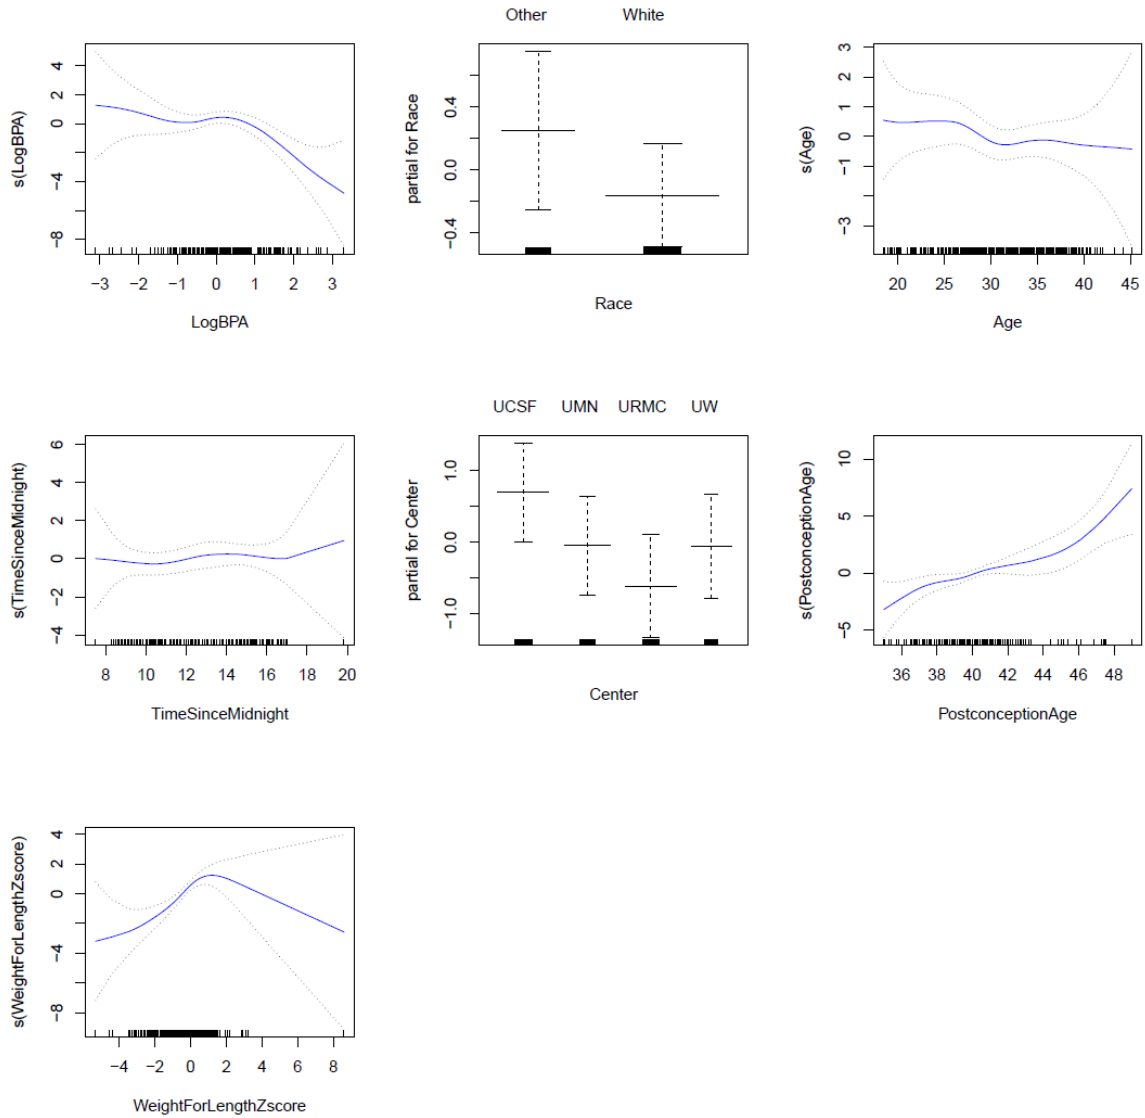

**Figure S3: Adjusted generalized additive model plots with the response variable AGD-AC**

Abbreviations: LogBPA: Log-transformed specific gravity-adjusted BPA; Race: Child's race; Age: Mother's age in years; TimeSinceMidnight: Time, since midnight, of urine collection; Center: Study Site; PostconceptionAge: Child's Post conception age; WeightForLengthZscore: Weight-for-Length Z-Score

The middle line in each panel shows the estimated effect of the covariate on the outcome (y-axis) plotted against the raw value of the covariate (x-axis), after adjusting for all other model covariates. Upper and lower lines (continuous variables) or bars (categorical variables) show +/- the pointwise standard error.

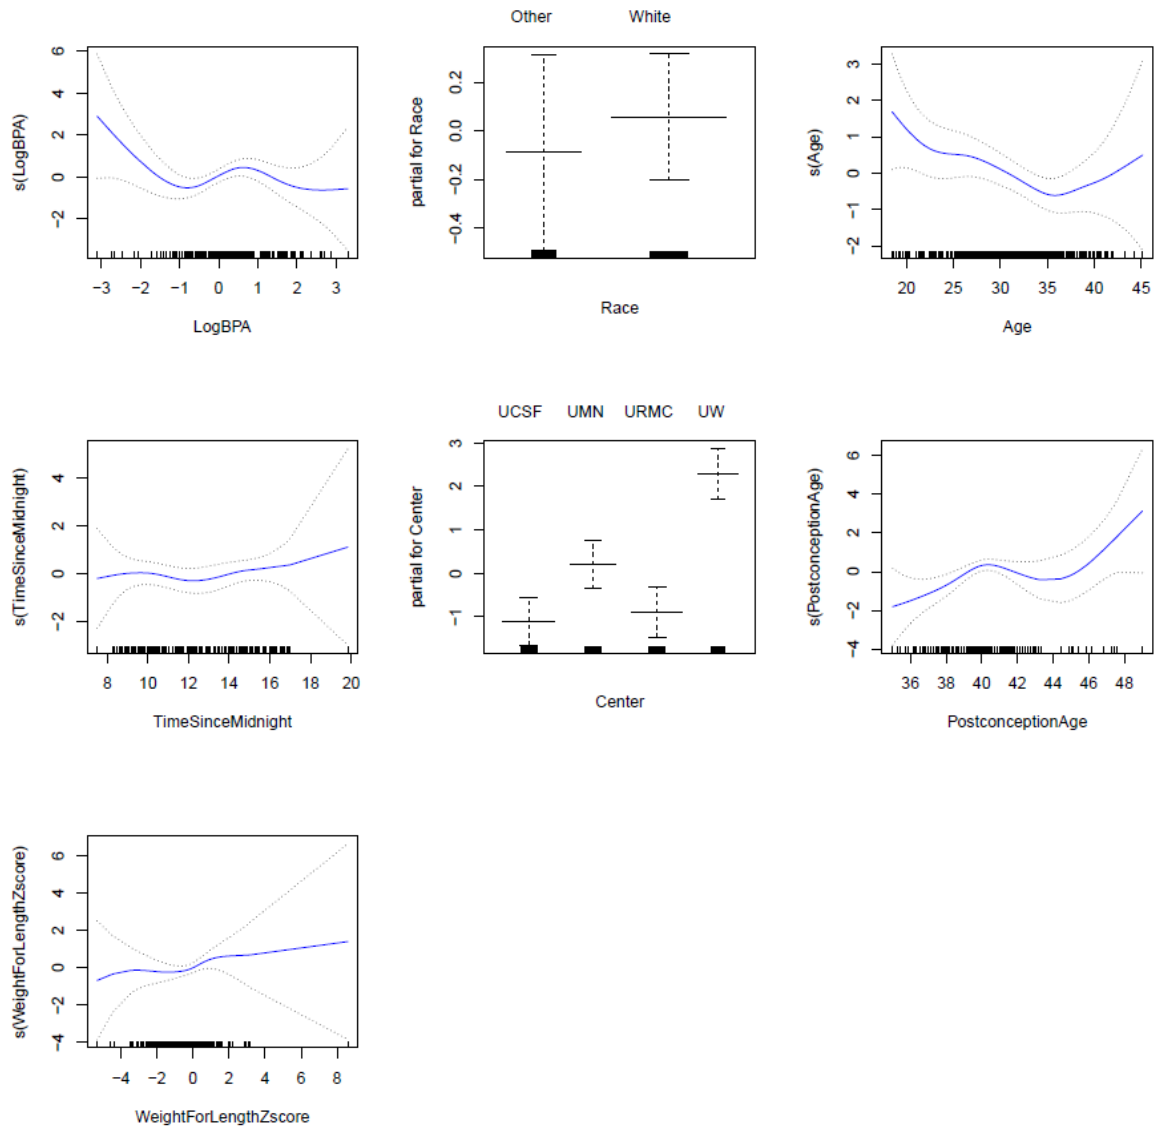

**Figure S4: Adjusted generalized additive model plots with the response variable AGD-AF**

Abbreviations: LogBPA: Log-transformed specific gravity-adjusted BPA; Race: Child's race; Age: Mother's age in years; TimeSinceMidnight: Time, since midnight, of urine collection; Center: Study Site; PostconceptionAge: Child's Post conception age; WeightForLengthZscore: Weight-for-Length Z-Score

The middle line in each panel shows the estimated effect of the covariate on the outcome (y-axis) plotted against the raw value of the covariate (x-axis), after adjusting for all other model covariates. Upper and lower lines (continuous variables) or bars (categorical variables) show +/- the pointwise standard error.
